# Supplementary material for: Detection of vancomycin-resistant Enterococcus faecium hospital-adapted lineages in municipal wastewater treatment plants indicates widespread distribution and release into the environment
Source: Genome Res. 2019 Apr;29(4):626–34. doi: 10.1101/gr.232629.117 (PMC6442392; doi:10.1101/gr.232629.117)
Supplement: Supplemental Material [file supp_gr.232629.117_Supplemental_Table_S2.xlsx]

## Sheet: Suppl Table S2
Supplemental Table S2. List of isolates and accession numbers.
IsolateID	Accession_number	ST	Year	Origin	BAPS	Clade	Location
10678_8#11	ERR369948	117	2012	Human_Invasive	3	A1	H2
10678_8#18	ERR369955	22	2012	Human_Invasive	2	A2	CUH
10678_8#20	ERR369957	22	2010	Human_Invasive	2	A2	CUH
10678_8#34	ERR369971	117	2012	Human_Invasive	3	A1	CUH
10678_8#35	ERR369972	412	2012	Human_Invasive	3	A1	CUH
10678_8#39	ERR369976	64	2011	Human_Invasive	2	A1	CUH
10678_8#43	ERR369980	17	2010	Human_Invasive	2	A1	CUH
10678_8#48	ERR369985	117	2012	Human_Invasive	3	A1	CUH
10678_8#53	ERR369990	117	2012	Human_Invasive	3	A1	CUH
10678_8#55	ERR369992	192	2012	Human_Invasive	3	A1	CUH
10678_8#60	ERR369997	17	2012	Human_Invasive	2	A1	H3
10678_8#62	ERR369999	203	2010	Human_Invasive	3	A1	CUH
10678_8#66	ERR370003	290	2010	Human_Invasive	2	A1	CUH
10678_8#68	ERR370005	78	2012	Human_Invasive	3	A1	CUH
10678_8#7	ERR369944	616	2010	Human_Invasive	3	A1	CUH
10678_8#75	ERR370012	262	2012	Human_Invasive	4	A2	CUH
10678_8#8	ERR369945	412	2011	Human_Invasive	3	A1	CUH
10678_8#81	ERR370018	192	2010	Human_Invasive	3	A1	CUH
10678_8#82	ERR370019	18	2010	Human_Invasive	2	A1	CUH
10678_8#86	ERR370023	412	2012	Human_Invasive	3	A1	CUH
10678_8#88	ERR370025	117	2010	Human_Invasive	3	A1	CUH
10678_8#94	ERR370031	117	2011	Human_Invasive	3	A1	CUH
10702_7#27	ERR374675	412	2011	Human_Invasive	3	A1	H4
10702_7#38	ERR374686	412	2010	Human_Invasive	3	A1	H4
10702_7#93	ERR375304	80	2012	Human_Invasive	1	A1	CUH
10702_8#10	ERR375317	203	2011	Human_Invasive	3	A1	CUH
10702_8#11	ERR375318	412	2012	Human_Invasive	3	A1	CUH
10702_8#15	ERR375322	117	2012	Human_Invasive	3	A1	CUH
10702_8#16	ERR375323	32	2010	Human_Invasive	2	A2	CUH
10702_8#27	ERR375334	412	2011	Human_Invasive	3	A1	CUH
10702_8#28	ERR375335	412	2010	Human_Invasive	3	A1	CUH
10702_8#36	ERR375343	64	2010	Human_Invasive	2	A1	CUH
10702_8#39	ERR375346	117	2012	Human_Invasive	3	A1	H2
10702_8#4	ERR375311	18	2012	Human_Invasive	2	A1	CUH
10702_8#43	ERR375350	233	2010	Human_Invasive	2	A1	CUH
10702_8#47	ERR375354	117	2012	Human_Invasive	3	A1	CUH
10702_8#48	ERR375355	780	2012	Human_Invasive	3	A1	CUH
10702_8#5	ERR375312	117	2012	Human_Invasive	3	A1	CUH
10702_8#50	ERR375357	64	2011	Human_Invasive	2	A1	CUH
10702_8#51	ERR375358	280	2012	Human_Invasive	3	A1	H2
10702_8#53	ERR375360	203	2011	Human_Invasive	3	A1	CUH
10702_8#56	ERR375363	17	2012	Human_Invasive	2	A1	CUH
10702_8#57	ERR375364	80	2012	Human_Invasive	1	A1	H2
10702_8#58	ERR375365	78	2012	Human_Invasive	2	A1	H2
10702_8#59	ERR375366	203	2012	Human_Invasive	3	A1	CUH
10702_8#60	ERR375367	117	2010	Human_Invasive	3	A1	CUH
10702_8#63	ERR375370	412	2012	Human_Invasive	3	A1	CUH
10702_8#64	ERR375371	78	2012	Human_Invasive	3	A1	CUH
10702_8#66	ERR375373	551	2010	Human_Invasive	3	A1	CUH
10702_8#70	ERR375377	412	2010	Human_Invasive	3	A1	CUH
10702_8#72	ERR375379	18	2012	Human_Invasive	2	A1	CUH
10702_8#73	ERR375380	80	2012	Human_Invasive	3	A1	CUH
10702_8#74	ERR375381	412	2010	Human_Invasive	3	A1	CUH
10702_8#75	ERR375382	18	2010	Human_Invasive	2	A1	CUH
10702_8#78	ERR375385	80	2012	Human_Invasive	3	A1	CUH
10702_8#82	ERR375389	203	2011	Human_Invasive	3	A1	CUH
10702_8#83	ERR375390	117	2011	Human_Invasive	3	A1	CUH
10702_8#84	ERR375391	412	2012	Human_Invasive	3	A1	CUH
10702_8#85	ERR375392	192	2012	Human_Invasive	3	A1	H2
10702_8#86	ERR375393	117	2010	Human_Invasive	3	A1	CUH
10702_8#88	ERR375395	117	2010	Human_Invasive	3	A1	CUH
10702_8#9	ERR375316	78	2011	Human_Invasive	3	A1	CUH
10702_8#91	ERR375398	117	2012	Human_Invasive	3	A1	CUH
10702_8#92	ERR375399	412	2012	Human_Invasive	3	A1	CUH
10702_8#93	ERR375400	80	2012	Human_Invasive	1	A1	CUH
10733_1#10	ERR374726	264	2010	Human_Invasive	4	A2	H4
10733_1#84	ERR374800	18	2010	Human_Invasive	2	A1	CUH
10733_2#53	ERR374865	78	2011	Human_Invasive	3	A1	H5
10733_2#65	ERR374877	117	2010	Human_Invasive	3	A1	H4
10733_3#12	ERR374920	375	2010	Human_Invasive	3	A1	H4
10733_4#91	ERR375095	64	2011	Human_Invasive	2	A1	CUH
10733_6#69	ERR375265	117	2010	Human_Invasive	3	A1	H4
10733_7#36	ERR375406	280	2011	Human_Invasive	3	A1	CUH
10733_7#39	ERR375409	412	2011	Human_Invasive	3	A1	CUH
10733_7#42	ERR375412	17	2010	Human_Invasive	2	A1	CUH
10733_7#52	ERR375422	375	2010	Human_Invasive	3	A1	CUH
10733_7#56	ERR375426	375	2010	Human_Invasive	3	A1	CUH
10733_7#57	ERR375427	203	2011	Human_Invasive	3	A1	CUH
10733_7#61	ERR375431	80	2010	Human_Invasive	3	A1	CUH
10733_7#62	ERR375432	64	2011	Human_Invasive	2	A1	CUH
10733_7#63	ERR375433	412	2012	Human_Invasive	3	A1	CUH
10733_7#70	ERR375440	375	2010	Human_Invasive	2	A1	CUH
10733_7#75	ERR375445	64	2011	Human_Invasive	2	A1	CUH
10733_7#78	ERR375448	17	2010	Human_Invasive	2	A1	CUH
10733_7#80	ERR375450	80	2012	Human_Invasive	1	A1	CUH
10733_7#81	ERR375451	375	2010	Human_Invasive	3	A1	CUH
10733_7#87	ERR375457	64	2011	Human_Invasive	2	A1	CUH
10733_7#89	ERR375459	117	2012	Human_Invasive	3	A1	H3
10733_8#1	ERR375462	117	2011	Human_Invasive	3	A1	CUH
10733_8#10	ERR375471	64	2012	Human_Invasive	2	A1	CUH
10733_8#15	ERR375476	280	2012	Human_Invasive	3	A1	CUH
10733_8#19	ERR375480	18	2011	Human_Invasive	2	A1	CUH
10733_8#20	ERR375481	412	2012	Human_Invasive	3	A1	CUH
10733_8#21	ERR375482	117	2011	Human_Invasive	3	A1	CUH
10733_8#27	ERR375488	203	2012	Human_Invasive	3	A1	CUH
10733_8#28	ERR375489	80	2012	Human_Invasive	3	A1	H2
10733_8#30	ERR375491	117	2010	Human_Invasive	3	A1	CUH
10733_8#33	ERR375494	17	2012	Human_Invasive	2	A1	CUH
10733_8#34	ERR375495	117	2011	Human_Invasive	3	A1	CUH
10733_8#37	ERR375498	412	2011	Human_Invasive	3	A1	CUH
10733_8#39	ERR375500	117	2011	Human_Invasive	3	A1	CUH
10733_8#41	ERR375502	780	2012	Human_Invasive	3	A1	CUH
10733_8#5	ERR375466	80	2012	Human_Invasive	1	A1	CUH
10733_8#53	ERR375514	412	2011	Human_Invasive	3	A1	CUH
10733_8#54	ERR375515	78	2010	Human_Invasive	3	A1	CUH
10733_8#55	ERR375516	17	2011	Human_Invasive	2	A1	CUH
10733_8#59	ERR375520	18	2012	Human_Invasive	2	A1	H2
10733_8#61	ERR375522	203	2011	Human_Invasive	3	A1	CUH
10733_8#62	ERR375523	117	2011	Human_Invasive	3	A1	CUH
10733_8#63	ERR375524	412	2010	Human_Invasive	3	A1	CUH
10733_8#68	ERR375529	412	2011	Human_Invasive	3	A1	CUH
10733_8#69	ERR375530	551	2010	Human_Invasive	3	A1	CUH
10733_8#7	ERR375468	117	2012	Human_Invasive	3	A1	CUH
10733_8#71	ERR375532	117	2010	Human_Invasive	3	A1	CUH
10733_8#73	ERR375534	551	2010	Human_Invasive	3	A1	CUH
10733_8#76	ERR375537	17	2012	Human_Invasive	2	A1	H3
10733_8#77	ERR375538	203	2012	Human_Invasive	3	A1	CUH
10733_8#78	ERR375539	551	2012	Human_Invasive	3	A1	CUH
10733_8#81	ERR375542	280	2010	Human_Invasive	3	A1	CUH
10733_8#89	ERR375550	17	2012	Human_Invasive	2	A1	CUH
10733_8#90	ERR375551	789	2012	Human_Invasive	3	A1	CUH
10733_8#94	ERR375555	203	2012	Human_Invasive	3	A1	CUH
10733_8#95	ERR375556	412	2012	Human_Invasive	3	A1	CUH
10733_8#96	ERR375557	280	2011	Human_Invasive	3	A1	CUH
10770_1#11	ERR377434	117	2011	Human_Invasive	3	A1	CUH
10770_1#13	ERR377436	117	2011	Human_Invasive	3	A1	CUH
10770_1#14	ERR377437	412	2012	Human_Invasive	3	A1	CUH
10770_1#15	ERR377438	78	2012	Human_Invasive	3	A1	H2
10770_1#16	ERR377439	117	2011	Human_Invasive	3	A1	CUH
10770_1#17	ERR377440	412	2010	Human_Invasive	3	A1	CUH
10770_1#19	ERR377442	203	2010	Human_Invasive	3	A1	CUH
10770_1#2	ERR377425	412	2012	Human_Invasive	3	A1	CUH
10770_1#20	ERR377443	375	2011	Human_Invasive	3	A1	CUH
10770_1#23	ERR377446	192	2012	Human_Invasive	3	A1	CUH
10770_1#27	ERR377450	80	2012	Human_Invasive	1	A1	CUH
10770_1#35	ERR377458	412	2012	Human_Invasive	3	A1	CUH
10770_1#39	ERR377462	64	2012	Human_Invasive	2	A1	H3
10770_1#41	ERR377464	18	2012	Human_Invasive	2	A1	H2
10770_1#42	ERR377465	203	2011	Human_Invasive	3	A1	CUH
10770_1#45	ERR377468	280	2012	Human_Invasive	3	A1	CUH
10770_1#46	ERR377469	80	2011	Human_Invasive	3	A1	CUH
10770_1#54	ERR377477	203	2011	Human_Invasive	3	A1	CUH
10770_1#55	ERR377478	280	2012	Human_Invasive	3	A1	CUH
10770_1#6	ERR377429	412	2012	Human_Invasive	3	A1	CUH
10770_1#60	ERR377483	412	2012	Human_Invasive	3	A1	CUH
10770_1#61	ERR377484	78	2012	Human_Invasive	3	A1	CUH
10770_1#63	ERR377486	117	2012	Human_Invasive	3	A1	CUH
10770_1#68	ERR377491	412	2012	Human_Invasive	3	A1	CUH
10770_1#69	ERR377492	551	2010	Human_Invasive	3	A1	CUH
10770_1#7	ERR377430	203	2010	Human_Invasive	3	A1	CUH
10770_1#70	ERR377493	18	2010	Human_Invasive	2	A1	CUH
10770_1#71	ERR377494	192	2011	Human_Invasive	3	A1	CUH
10770_1#73	ERR377496	412	2010	Human_Invasive	3	A1	CUH
10770_1#74	ERR377497	412	2011	Human_Invasive	3	A1	CUH
10770_1#78	ERR377501	78	2012	Human_Invasive	3	A1	CUH
10770_1#82	ERR377505	64	2011	Human_Invasive	2	A1	CUH
10770_1#87	ERR377510	280	2011	Human_Invasive	3	A1	CUH
10770_1#89	ERR377512	80	2010	Human_Invasive	1	A1	CUH
10770_1#96	ERR377519	17	2012	Human_Invasive	2	A1	CUH
10900_1#2	ERR388698	117	2010	Human_Invasive	3	A1	CUH
10900_1#5	ERR388701	80	2011	Human_Invasive	3	A1	CUH
10900_1#6	ERR388702	552	2010	Human_Invasive	3	A1	CUH
10900_4#76	ERR388723	78	2011	Human_Invasive	3	A1	CUH
10900_4#77	ERR388724	78	2012	Human_Invasive	3	A1	H3
16356_1#22	ERR987499	266	2014	Wastewater	4	A2	W2
16356_1#23	ERR987500	1202	2014	Wastewater	7	B	W2
16356_1#24	ERR987501	94	2014	Wastewater	5	B	W2
16356_1#25	ERR987502	94	2014	Wastewater	5	B	W2
16356_1#26	ERR987503	1217	2014	Wastewater	2	A2	W2
16356_1#27	ERR987504	1	2014	Wastewater	4	A2	W2
16356_1#28	ERR987505	1216	2014	Wastewater	4	A2	W2
16356_1#29	ERR987506	253	2014	Wastewater	4	A2	W2
16356_1#30	ERR987507	1478	2014	Wastewater	3	A1	W2
16356_1#31	ERR987508	17	2014	Wastewater	2	A1	W2
16356_1#32	ERR987509	203	2014	Wastewater	3	A1	W2
16356_1#33	ERR987510	17	2014	Wastewater	2	A1	W2
16356_1#34	ERR987511	18	2014	Wastewater	2	A1	W2
16356_1#35	ERR987512	1478	2014	Wastewater	3	A1	W2
16356_1#36	ERR987513	1215	2014	Wastewater	4	A2	W2
16356_1#37	ERR987514	262	2014	Wastewater	2	A1	W3
16356_1#38	ERR987515	18	2014	Wastewater	2	A1	W2
16356_1#39	ERR987516	80	2014	Wastewater	3	A1	W3
16356_1#40	ERR987517	60	2014	Wastewater	5	B	W3
16356_1#41	ERR987518	1213	2014	Wastewater	4	A2	W3
16356_1#42	ERR987519	17	2014	Wastewater	2	A1	W4
16356_1#43	ERR987520	18	2014	Wastewater	2	A1	W4
16356_1#44	ERR987521	18	2014	Wastewater	2	A1	W4
16356_1#45	ERR987522	32	2014	Wastewater	2	A2	W4
16356_1#46	ERR987523	80	2014	Wastewater	1	A1	W5
16356_1#47	ERR987524	80	2014	Wastewater	1	A1	W5
16356_1#48	ERR987525	695	2014	Wastewater	5	B	W4
16356_1#49	ERR987526	17	2014	Wastewater	2	A1	W4
16356_1#50	ERR987527	412	2014	Wastewater	3	A1	W3
16356_1#51	ERR987528	262	2014	Wastewater	2	A1	W3
16356_1#53	ERR987530	80	2014	Wastewater	1	A1	W5
16356_1#54	ERR987531	1214	2014	Wastewater	2	A2	W3
16356_1#55	ERR987532	1210	2014	Wastewater	2	A2	W3
16356_1#56	ERR987533	1211	2014	Wastewater	2	A2	W3
16356_1#57	ERR987534	92	2014	Wastewater	2	A2	W3
16356_1#58	ERR987535	214	2014	Wastewater	2	A2	W3
16356_1#59	ERR987536	80	2014	Wastewater	1	A1	W3
16356_1#60	ERR987537	80	2014	Wastewater	1	A1	W3
16356_1#61	ERR987538	80	2014	Wastewater	1	A1	W3
16356_1#62	ERR987539	17	2014	Wastewater	2	A1	W4
16356_1#63	ERR987540	18	2014	Wastewater	2	A1	W2
16356_1#64	ERR987541	230	2014	Wastewater	3	A1	W2
16356_1#65	ERR987542	230	2014	Wastewater	3	A1	W2
16356_1#66	ERR987543	78	2014	Wastewater	3	A1	W4
16356_1#67	ERR987544	230	2014	Wastewater	3	A1	W4
16356_1#68	ERR987545	78	2014	Wastewater	3	A1	W4
16356_1#69	ERR987546	230	2014	Wastewater	3	A1	W4
16356_1#70	ERR987547	18	2014	Wastewater	2	A1	W5
16356_1#71	ERR987548	80	2014	Wastewater	1	A1	W5
16356_1#72	ERR987549	80	2014	Wastewater	1	A1	W5
16356_1#73	ERR987550	80	2014	Wastewater	1	A1	W5
16356_1#74	ERR987551	18	2014	Wastewater	2	A1	W4
16356_1#75	ERR987552	1223	2014	Wastewater	4	A2	W4
16356_1#76	ERR987553	18	2014	Wastewater	2	A1	W4
16356_1#77	ERR987554	83	2014	Wastewater	4	A2	W4
16356_1#78	ERR987555	32	2014	Wastewater	2	A2	W3
16356_1#79	ERR987556	262	2014	Wastewater	2	A1	W3
16356_1#80	ERR987557	262	2014	Wastewater	2	A1	W3
16356_1#81	ERR987558	60	2014	Wastewater	5	B	W6
16356_1#83	ERR987560	22	2014	Wastewater	2	A2	W6
16356_1#84	ERR987561	94	2014	Wastewater	5	B	W6
16356_1#85	ERR987562	18	2014	Wastewater	2	A1	W6
16356_1#86	ERR987563	80	2014	Wastewater	1	A1	W3
16356_1#87	ERR987564	78	2014	Wastewater	3	A1	W6
16356_1#88	ERR987565	80	2014	Wastewater	1	A1	W4
16356_2#1	ERR987566	80	2014	Wastewater	1	A1	W6
16356_2#10	ERR987575	80	2014	Wastewater	1	A1	W4
16356_2#11	ERR987576	80	2014	Wastewater	1	A1	W4
16356_2#12	ERR987577	78	2014	Wastewater	3	A1	W4
16356_2#13	ERR987578	80	2014	Wastewater	1	A1	W4
16356_2#14	ERR987579	80	2014	Wastewater	1	A1	W6
16356_2#15	ERR987580	80	2014	Wastewater	1	A1	W6
16356_2#16	ERR987581	253	2014	Wastewater	4	A2	W6
16356_2#17	ERR987582	192	2014	Wastewater	2	A2	W5
16356_2#18	ERR987583	80	2014	Wastewater	1	A1	W6
16356_2#19	ERR987584	80	2014	Wastewater	1	A1	W6
16356_2#2	ERR987567	80	2014	Wastewater	1	A1	W6
16356_2#20	ERR987585	78	2014	Wastewater	2	A1	W6
16356_2#21	ERR987586	80	2014	Wastewater	3	A1	W6
16356_2#22	ERR987587	22	2014	Wastewater	2	A2	W5
16356_2#23	ERR987588	654	2014	Wastewater	5	B	W5
16356_2#24	ERR987589	928	2014	Wastewater	7	B	W5
16356_2#25	ERR987590	80	2014	Wastewater	1	A1	W6
16356_2#26	ERR987591	21	2014	Wastewater	2	A2	W5
16356_2#27	ERR987592	18	2014	Wastewater	2	A1	W5
16356_2#28	ERR987593	80	2014	Wastewater	3	A1	W5
16356_2#29	ERR987594	372	2014	Wastewater	4	A2	W7
16356_2#3	ERR987568	80	2014	Wastewater	1	A1	W6
16356_2#30	ERR987595	94	2014	Wastewater	5	B	W7
16356_2#31	ERR987596	107	2014	Wastewater	7	B	W7
16356_2#32	ERR987597	18	2014	Wastewater	2	A1	W7
16356_2#33	ERR987598	192	2014	Wastewater	2	A2	W7
16356_2#34	ERR987599	1209	2014	Wastewater	4	A2	W7
16356_2#35	ERR987600	80	2014	Wastewater	2	A1	W7
16356_2#36	ERR987601	412	2014	Wastewater	3	A1	W7
16356_2#37	ERR987602	17	2014	Wastewater	2	A1	W7
16356_2#38	ERR987603	474	2014	Wastewater	6	B	W8
16356_2#39	ERR987604	696	2014	Wastewater	5	B	W8
16356_2#4	ERR987569	696	2014	Wastewater	5	B	W5
16356_2#40	ERR987605	18	2014	Wastewater	2	A1	W8
16356_2#41	ERR987606	192	2014	Wastewater	2	A2	W8
16356_2#42	ERR987607	266	2014	Wastewater	4	A2	W8
16356_2#43	ERR987608	1233	2014	Wastewater	4	A2	W8
16356_2#44	ERR987609	296	2014	Wastewater	5	B	W8
16356_2#45	ERR987610	296	2014	Wastewater	5	B	W8
16356_2#46	ERR987611	18	2014	Wastewater	2	A1	W8
16356_2#47	ERR987612	18	2014	Wastewater	2	A1	W8
16356_2#48	ERR987613	94	2014	Wastewater	5	B	W9
16356_2#49	ERR987614	474	2014	Wastewater	6	B	W9
16356_2#5	ERR987570	401	2014	Wastewater	4	A2	W5
16356_2#50	ERR987615	18	2014	Wastewater	2	A1	W9
16356_2#51	ERR987616	19	2014	Wastewater	2	A2	W9
16356_2#52	ERR987617	18	2014	Wastewater	2	A1	W9
16356_2#53	ERR987618	1244	2014	Wastewater	5	B	W9
16356_2#54	ERR987619	192	2014	Wastewater	2	A2	W9
16356_2#55	ERR987620	18	2014	Wastewater	2	A1	W9
16356_2#56	ERR987621	38	2014	Wastewater	4	A2	W10
16356_2#57	ERR987622	38	2014	Wastewater	4	A2	W10
16356_2#58	ERR987623	38	2014	Wastewater	4	A2	W10
16356_2#59	ERR987624	60	2014	Wastewater	5	B	W10
16356_2#6	ERR987571	80	2014	Wastewater	3	A1	W5
16356_2#60	ERR987625	1135	2014	Wastewater	5	B	W10
16356_2#61	ERR987626	18	2014	Wastewater	2	A1	W10
16356_2#62	ERR987627	192	2014	Wastewater	3	A1	W10
16356_2#63	ERR987628	18	2014	Wastewater	2	A1	W10
16356_2#64	ERR987629	203	2014	Wastewater	3	A1	W10
16356_2#65	ERR987630	18	2014	Wastewater	2	A1	W10
16356_2#66	ERR987631	413	2014	Wastewater	2	A2	W11
16356_2#67	ERR987632	94	2014	Wastewater	5	B	W11
16356_2#68	ERR987633	224	2014	Wastewater	7	B	W11
16356_2#69	ERR987634	70	2014	Wastewater	4	A2	W11
16356_2#7	ERR987572	80	2014	Wastewater	1	A1	W6
16356_2#70	ERR987635	94	2014	Wastewater	5	B	W11
16356_2#71	ERR987636	1255	2014	Wastewater	7	B	W11
16356_2#72	ERR987637	94	2014	Wastewater	5	B	W11
16356_2#73	ERR987638	640	2014	Wastewater	4	A2	W11
16356_2#74	ERR987639	18	2014	Wastewater	2	A1	W11
16356_2#75	ERR987640	569	2014	Wastewater	4	A2	W11
16356_2#76	ERR987641	361	2014	Wastewater	5	B	W12
16356_2#77	ERR987642	32	2014	Wastewater	2	A2	W12
16356_2#78	ERR987643	18	2014	Wastewater	2	A1	W12
16356_2#79	ERR987644	80	2014	Wastewater	1	A1	W12
16356_2#80	ERR987645	787	2014	Wastewater	1	A1	W12
16356_2#81	ERR987646	266	2014	Wastewater	4	A2	W12
16356_2#82	ERR987647	1261	2014	Wastewater	5	B	W12
16356_2#83	ERR987648	80	2014	Wastewater	1	A1	W12
16356_2#84	ERR987649	80	2014	Wastewater	1	A1	W12
16356_2#85	ERR987650	80	2014	Wastewater	1	A1	W12
16356_2#86	ERR987651	262	2014	Wastewater	2	A1	W12
16356_2#87	ERR987652	266	2014	Wastewater	4	A2	W13
16356_2#88	ERR987653	266	2014	Wastewater	4	A2	W13
16356_2#9	ERR987574	80	2014	Wastewater	1	A1	W5
16404_1#1	ERR984971	266	2014	Wastewater	4	A2	W13
16404_1#10	ERR984979	253	2014	Wastewater	4	A2	W14
16404_1#12	ERR984980	192	2014	Wastewater	3	A1	W14
16404_1#13	ERR984981	80	2014	Wastewater	1	A1	W14
16404_1#14	ERR984982	266	2014	Wastewater	4	A2	W13
16404_1#15	ERR984983	80	2014	Wastewater	1	A1	W15
16404_1#16	ERR984984	203	2014	Wastewater	3	A1	W15
16404_1#17	ERR984985	18	2014	Wastewater	2	A1	W15
16404_1#18	ERR984986	18	2014	Wastewater	2	A1	W15
16404_1#2	ERR984972	266	2014	Wastewater	4	A2	W13
16404_1#20	ERR984987	17	2014	Wastewater	2	A1	W15
16404_1#21	ERR984988	533	2014	Wastewater	4	A2	W15
16404_1#22	ERR984989	80	2014	Wastewater	1	A1	W15
16404_1#23	ERR984990	80	2014	Wastewater	3	A1	W15
16404_1#24	ERR984991	80	2014	Wastewater	1	A1	W15
16404_1#25	ERR984992	22	2014	Wastewater	2	A2	W16
16404_1#26	ERR984993	1262	2014	Wastewater	2	A2	W16
16404_1#28	ERR984994	834	2014	Wastewater	7	B	W16
16404_1#29	ERR984995	202	2014	Wastewater	1	A1	W16
16404_1#30	ERR984996	262	2014	Wastewater	2	A1	W16
16404_1#31	ERR984997	18	2014	Wastewater	2	A1	W16
16404_1#32	ERR984998	1029	2014	Wastewater	2	A1	W16
16404_1#33	ERR984999	885	2014	Wastewater	4	A2	W16
16404_1#34	ERR985000	19	2014	Wastewater	2	A2	W16
16404_1#36	ERR985001	203	2014	Wastewater	3	A1	W14
16404_1#37	ERR985002	266	2014	Wastewater	4	A2	W13
16404_1#39	ERR985004	604	2014	Wastewater	5	B	W17
16404_1#4	ERR984973	253	2014	Wastewater	4	A2	W13
16404_1#40	ERR985005	80	2014	Wastewater	1	A1	W14
16404_1#41	ERR985006	1263	2014	Wastewater	2	A1	W17
16404_1#42	ERR985007	192	2014	Wastewater	3	A1	W10
16404_1#44	ERR985008	780	2014	Wastewater	3	A1	W10
16404_1#45	ERR985009	780	2014	Wastewater	3	A1	W10
16404_1#46	ERR985010	178	2014	Wastewater	5	B	W17
16404_1#47	ERR985011	148	2014	Wastewater	4	A2	W17
16404_1#48	ERR985012	80	2014	Wastewater	1	A1	W17
16404_1#49	ERR985013	80	2014	Wastewater	1	A1	W17
16404_1#5	ERR984974	266	2014	Wastewater	4	A2	W13
16404_1#50	ERR985014	787	2014	Wastewater	1	A1	W7
16404_1#52	ERR985015	262	2014	Wastewater	2	A1	W7
16404_1#53	ERR985016	787	2014	Wastewater	1	A1	W7
16404_1#54	ERR985017	780	2014	Wastewater	3	A1	W10
16404_1#55	ERR985018	780	2014	Wastewater	3	A1	W10
16404_1#56	ERR985019	780	2014	Wastewater	3	A1	W10
16404_1#57	ERR985020	80	2014	Wastewater	1	A1	W14
16404_1#58	ERR985021	787	2014	Wastewater	1	A1	W7
16404_1#6	ERR984975	266	2014	Wastewater	4	A2	W13
16404_1#60	ERR985022	787	2014	Wastewater	2	A1	W7
16404_1#61	ERR985023	262	2014	Wastewater	2	A1	W7
16404_1#62	ERR985024	80	2014	Wastewater	1	A1	W7
16404_1#63	ERR985025	80	2014	Wastewater	1	A1	W8
16404_1#64	ERR985026	80	2014	Wastewater	3	A1	W11
16404_1#65	ERR985027	80	2014	Wastewater	1	A1	W14
16404_1#66	ERR985028	80	2014	Wastewater	1	A1	W8
16404_1#68	ERR985029	80	2014	Wastewater	1	A1	W8
16404_1#69	ERR985030	80	2014	Wastewater	1	A1	W9
16404_1#7	ERR984976	52	2014	Wastewater	4	A2	W14
16404_1#70	ERR985031	80	2014	Wastewater	1	A1	W9
16404_1#71	ERR985032	80	2014	Wastewater	1	A1	W9
16404_1#72	ERR985033	787	2014	Wastewater	1	A1	W9
16404_1#73	ERR985034	18	2014	Wastewater	2	A1	W17
16404_1#74	ERR985035	80	2014	Wastewater	3	A1	W9
16404_1#76	ERR985036	80	2014	Wastewater	3	A1	W11
16404_1#77	ERR985037	80	2014	Wastewater	3	A1	W11
16404_1#78	ERR985038	80	2014	Wastewater	3	A1	W11
16404_1#79	ERR985039	1220	2014	Wastewater	1	A1	W14
16404_1#8	ERR984977	772	2014	Wastewater	3	A1	W14
16404_1#80	ERR985040	80	2014	Wastewater	1	A1	W14
16404_1#81	ERR985041	80	2014	Wastewater	3	A1	W11
16404_1#82	ERR985042	80	2014	Wastewater	3	A1	W11
16404_1#84	ERR985043	17	2014	Wastewater	2	A1	W12
16404_1#85	ERR985044	117	2014	Wastewater	1	A1	W12
16404_1#86	ERR985045	17	2014	Wastewater	2	A1	W12
16404_1#87	ERR985046	1220	2014	Wastewater	1	A1	W14
16404_1#88	ERR985047	17	2014	Wastewater	2	A1	W16
16404_1#9	ERR984978	761	2014	Wastewater	1	A1	W14
16404_2#1	ERR985048	117	2014	Wastewater	1	A1	W12
16404_2#10	ERR985057	80	2014	Wastewater	1	A1	W13
16404_2#11	ERR985058	80	2014	Wastewater	1	A1	W13
16404_2#12	ERR985059	80	2014	Wastewater	1	A1	W13
16404_2#13	ERR985060	17	2014	Wastewater	2	A1	W16
16404_2#14	ERR985061	80	2014	Wastewater	1	A1	W17
16404_2#15	ERR985062	80	2014	Wastewater	1	A1	W17
16404_2#16	ERR985063	80	2014	Wastewater	1	A1	W17
16404_2#17	ERR985064	78	2014	Wastewater	3	A1	W15
16404_2#18	ERR985065	280	2014	Wastewater	3	A1	W15
16404_2#19	ERR985066	80	2014	Wastewater	1	A1	W15
16404_2#2	ERR985049	117	2014	Wastewater	1	A1	W12
16404_2#20	ERR985067	78	2014	Wastewater	3	A1	W15
16404_2#21	ERR985068	17	2014	Wastewater	2	A1	W15
16404_2#22	ERR985069	80	2014	Wastewater	1	A1	W16
16404_2#23	ERR985070	80	2014	Wastewater	1	A1	W16
16404_2#24	ERR985071	80	2014	Wastewater	1	A1	W16
16404_2#25	ERR985072	17	2014	Wastewater	2	A1	W16
16404_2#26	ERR985073	992	2014	Wastewater	3	A1	W16
16404_2#27	ERR985074	80	2014	Wastewater	2	A1	W16
16404_2#28	ERR985075	992	2014	Wastewater	3	A1	W16
16404_2#29	ERR985076	992	2014	Wastewater	3	A1	W16
16404_2#3	ERR985050	117	2014	Wastewater	1	A1	W12
16404_2#30	ERR985077	97	2014	Wastewater	4	A2	W1
16404_2#31	ERR985078	796	2014	Wastewater	3	A1	W1
16404_2#32	ERR985079	80	2014	Wastewater	1	A1	W1
16404_2#33	ERR985080	17	2014	Wastewater	2	A1	W1
16404_2#34	ERR985081	18	2014	Wastewater	2	A1	W1
16404_2#35	ERR985082	80	2014	Wastewater	1	A1	W1
16404_2#36	ERR985083	18	2014	Wastewater	2	A1	W1
16404_2#37	ERR985084	78	2014	Wastewater	3	A1	W15
16404_2#38	ERR985085	262	2014	Wastewater	2	A1	W1
16404_2#39	ERR985086	1203	2014	Wastewater	2	A2	W1
16404_2#4	ERR985051	17	2014	Wastewater	2	A1	W12
16404_2#40	ERR985087	178	2014	Wastewater	5	B	W1
16404_2#41	ERR985088	117	2014	Wastewater	3	A1	W17
16404_2#42	ERR985089	412	2014	Wastewater	3	A1	W17
16404_2#43	ERR985090	64	2014	Wastewater	2	A1	W17
16404_2#44	ERR985091	80	2014	Wastewater	1	A1	W17
16404_2#45	ERR985092	1216	2014	Wastewater	4	A2	W1
16404_2#46	ERR985093	80	2014	Wastewater	1	A1	W1
16404_2#47	ERR985094	787	2014	Wastewater	2	A1	W1
16404_2#48	ERR985095	1204	2014	Wastewater	4	A2	W1
16404_2#49	ERR985096	97	2014	Wastewater	4	A2	W1
16404_2#5	ERR985052	80	2014	Wastewater	1	A1	W13
16404_2#50	ERR985097	780	2014	Wastewater	1	A1	W1
16404_2#51	ERR985098	780	2014	Wastewater	3	A1	W1
16404_2#52	ERR985099	80	2014	Wastewater	1	A1	W13
16404_2#53	ERR985100	80	2014	Wastewater	1	A1	W17
16404_2#55	ERR985102	17	2014	Wastewater	2	A1	W17
16404_2#56	ERR985103	80	2014	Wastewater	1	A1	W17
16404_2#57	ERR985104	1218	2014	Wastewater	5	B	W18
16404_2#58	ERR985105	253	2014	Wastewater	4	A2	W18
16404_2#59	ERR985106	1212	2014	Wastewater	4	A2	W18
16404_2#6	ERR985053	80	2014	Wastewater	1	A1	W13
16404_2#60	ERR985107	80	2014	Wastewater	1	A1	W18
16404_2#61	ERR985108	401	2014	Wastewater	4	A2	W18
16404_2#62	ERR985109	203	2014	Wastewater	3	A1	W18
16404_2#63	ERR985110	203	2014	Wastewater	3	A1	W18
16404_2#64	ERR985111	203	2014	Wastewater	3	A1	W18
16404_2#65	ERR985112	80	2014	Wastewater	1	A1	W18
16404_2#66	ERR985113	78	2014	Wastewater	3	A1	W18
16404_2#67	ERR985114	1219	2014	Wastewater	7	B	W18
16404_2#68	ERR985115	1205	2014	Wastewater	5	B	W18
16404_2#69	ERR985116	80	2014	Wastewater	1	A1	W18
16404_2#7	ERR985054	80	2014	Wastewater	1	A1	W13
16404_2#70	ERR985117	280	2014	Wastewater	2	A1	W18
16404_2#71	ERR985118	612	2014	Wastewater	3	A1	W18
16404_2#72	ERR985119	230	2014	Wastewater	3	A1	W18
16404_2#73	ERR985120	280	2014	Wastewater	2	A1	W18
16404_2#74	ERR985121	203	2014	Wastewater	3	A1	W18
16404_2#75	ERR985122	203	2014	Wastewater	3	A1	W18
16404_2#76	ERR985123	17	2014	Wastewater	2	A1	W18
16404_2#77	ERR985124	502	2014	Wastewater	2	A2	W19
16404_2#78	ERR985125	1202	2014	Wastewater	7	B	W19
16404_2#79	ERR985126	401	2014	Wastewater	4	A2	W19
16404_2#8	ERR985055	80	2014	Wastewater	1	A1	W13
16404_2#80	ERR985127	1263	2014	Wastewater	2	A1	W19
16404_2#81	ERR985128	78	2014	Wastewater	3	A1	W19
16404_2#82	ERR985129	132	2014	Wastewater	1	A1	W19
16404_2#83	ERR985130	17	2014	Wastewater	2	A1	W19
16404_2#84	ERR985131	17	2014	Wastewater	2	A1	W19
16404_2#85	ERR985132	78	2014	Wastewater	3	A1	W19
16404_2#86	ERR985133	80	2014	Wastewater	2	A1	W19
16404_2#87	ERR985134	253	2014	Wastewater	4	A2	W19
16404_2#88	ERR985135	623	2014	Wastewater	7	B	W19
16404_2#9	ERR985056	80	2014	Wastewater	1	A1	W13
16880_8#1	ERR1036024	1208	2014	Wastewater	2	A2	W19
16880_8#10	ERR1036033	1207	2015	Wastewater	2	A2	W20
16880_8#11	ERR1036034	18	2015	Wastewater	2	A1	W20
16880_8#12	ERR1036035	80	2014	Wastewater	1	A1	W17
16880_8#13	ERR1036036	80	2015	Wastewater	1	A1	W20
16880_8#14	ERR1036037	78	2015	Wastewater	3	A1	W20
16880_8#15	ERR1036038	80	2015	Wastewater	1	A1	W20
16880_8#16	ERR1036039	78	2015	Wastewater	3	A1	W20
16880_8#17	ERR1036040	80	2015	Wastewater	1	A1	W20
16880_8#18	ERR1036041	1206	2015	Wastewater	5	B	W20
16880_8#19	ERR1036042	54	2015	Wastewater	4	A2	W20
16880_8#2	ERR1036025	17	2014	Wastewater	2	A1	W19
16880_8#20	ERR1036043	80	2014	Wastewater	1	A1	W13
16880_8#21	ERR1036044	125	2015	Wastewater	2	A1	W20
16880_8#22	ERR1036045	80	2015	Wastewater	2	A1	W20
16880_8#23	ERR1036046	78	2015	Wastewater	3	A1	W20
16880_8#24	ERR1036047	80	2015	Wastewater	1	A1	W20
16880_8#25	ERR1036048	80	2015	Wastewater	1	A1	W20
16880_8#26	ERR1036049	80	2015	Wastewater	1	A1	W20
16880_8#27	ERR1036050	80	2015	Wastewater	1	A1	W20
16880_8#28	ERR1036051	80	2014	Wastewater	1	A1	W14
16880_8#29	ERR1036052	80	2014	Wastewater	3	A1	W11
16880_8#3	ERR1036026	885	2014	Wastewater	4	A2	W19
16880_8#30	ERR1036053	1220	2014	Wastewater	1	A1	W14
16880_8#31	ERR1036054	80	2014	Wastewater	1	A1	W14
16880_8#32	ERR1036055	80	2014	Wastewater	1	A1	W9
16880_8#33	ERR1036056	262	2014	Wastewater	2	A1	W7
16880_8#34	ERR1036057	168	2014	Wastewater	4	A2	W14
16880_8#35	ERR1036058	203	2014	Wastewater	3	A1	W1
16880_8#36	ERR1036059	80	2014	Wastewater	2	A1	W1
16880_8#37	ERR1036060	80	2014	Wastewater	3	A1	W1
16880_8#38	ERR1036061	230	2014	Wastewater	3	A1	W2
16880_8#39	ERR1036062	17	2014	Wastewater	2	A1	W3
16880_8#4	ERR1036027	80	2014	Wastewater	2	A1	W19
16880_8#40	ERR1036063	214	2014	Wastewater	2	A2	W3
16880_8#41	ERR1036064	787	2014	Wastewater	1	A1	W6
16880_8#42	ERR1036065	80	2014	Wastewater	1	A1	W9
16880_8#43	ERR1036066	80	2014	Wastewater	1	A1	W9
16880_8#44	ERR1036067	80	2014	Wastewater	1	A1	W9
16880_8#45	ERR1036068	780	2014	Wastewater	3	A1	W10
16880_8#46	ERR1036069	80	2014	Wastewater	3	A1	W11
16880_8#47	ERR1036070	18	2014	Wastewater	2	A1	W14
16880_8#48	ERR1036071	78	2014	Wastewater	3	A1	W15
16880_8#49	ERR1036072	78	2014	Wastewater	3	A1	W15
16880_8#5	ERR1036028	80	2014	Wastewater	3	A1	W19
16880_8#50	ERR1036073	78	2014	Wastewater	3	A1	W15
16880_8#51	ERR1036074	78	2014	Wastewater	3	A1	W15
16880_8#52	ERR1036075	413	2015	Wastewater	2	A2	W20
16880_8#53	ERR1036076	19	2015	Wastewater	2	A2	W20
16880_8#54	ERR1036077	563	2015	Wastewater	4	A2	W20
16880_8#55	ERR1036078	168	2014	Wastewater	4	A2	W6
16880_8#56	ERR1036079	92	2014	Wastewater	2	A2	W14
16880_8#57	ERR1036080	787	2014	Wastewater	1	A1	W9
16880_8#6	ERR1036029	78	2014	Wastewater	3	A1	W19
16880_8#7	ERR1036030	80	2014	Wastewater	2	A1	W19
16880_8#8	ERR1036031	80	2014	Wastewater	1	A1	W19
16880_8#9	ERR1036032	22	2015	Wastewater	2	A2	W20
17138_5#83	ERR1069044	266	2014	Wastewater	4	A2	W13
17138_5#84	ERR1069045	1221	2014	Wastewater	7	B	W14
17138_5#85	ERR1069046	17	2014	Wastewater	2	A1	W15
17138_5#86	ERR1069047	623	2014	Wastewater	7	B	W16
17138_5#87	ERR1069048	1202	2014	Wastewater	7	B	W7
17138_5#88	ERR1069049	780	2014	Wastewater	3	A1	W10
17138_5#89	ERR1069050	787	2014	Wastewater	1	A1	W7
17138_5#90	ERR1069051	262	2014	Wastewater	2	A1	W7
17138_5#91	ERR1069052	80	2014	Wastewater	1	A1	W8
17138_5#92	ERR1069053	80	2014	Wastewater	1	A1	W9
17138_5#93	ERR1069054	80	2014	Wastewater	3	A1	W11
19647_8#142	ERR1541816	1453	2015	Wastewater_Hospital	4	A2	CUH_Sewer
19789_5#140	ERR1556983	1449	2015	Wastewater_Hospital	4	A2	CUH_Sewer
19789_5#154	ERR1556997	80	2014	Human_Invasive	1	A1	CUH
19789_5#35	ERR1556878	780	2015	Wastewater_Hospital	3	A1	CUH_Sewer
19789_5#44	ERR1556887	17	2014	Wastewater_Hospital	2	A1	CUH_Sewer
19789_5#46	ERR1556889	17	2014	Wastewater_Hospital	2	A1	CUH_Sewer
19789_5#61	ERR1556904	80	2015	Wastewater_Hospital	1	A1	CUH_Sewer
19789_5#62	ERR1556905	192	2015	Wastewater_Hospital	3	A1	CUH_Sewer
19789_5#63	ERR1556906	17	2015	Wastewater_Hospital	2	A1	CUH_Sewer
19789_5#64	ERR1556907	721	2015	Wastewater_Hospital	3	A1	CUH_Sewer
19789_5#66	ERR1556909	262	2014	Human_Invasive	2	A1	CUH
19789_6#1	ERR1557030	1442	2014	Wastewater_Hospital	7	B	CUH_Sewer
19789_6#105	ERR1557134	80	2015	Human_Invasive	3	A1	CUH
19789_6#106	ERR1557135	80	2015	Human_Invasive	1	A1	CUH
19789_6#126	ERR1557155	78	2015	Human_Invasive	3	A1	CUH
19789_6#138	ERR1557167	80	2015	Wastewater_Hospital	1	A1	CUH_Sewer
19789_6#139	ERR1557168	203	2015	Wastewater_Hospital	3	A1	CUH_Sewer
19789_6#141	ERR1557170	80	2015	Wastewater_Hospital	1	A1	CUH_Sewer
19789_6#142	ERR1557171	262	2015	Wastewater_Hospital	2	A1	CUH_Sewer
19789_6#143	ERR1557172	17	2015	Wastewater_Hospital	2	A1	CUH_Sewer
19789_6#146	ERR1557175	64	2015	Human_Invasive	2	A1	CUH
19789_6#15	ERR1557044	18	2015	Wastewater_Hospital	2	A1	CUH_Sewer
19789_6#16	ERR1557045	18	2015	Wastewater_Hospital	2	A1	CUH_Sewer
19789_6#165	ERR1557194	80	2015	Human_Invasive	1	A1	CUH
19789_6#17	ERR1557046	80	2015	Wastewater_Hospital	1	A1	CUH_Sewer
19789_6#178	ERR1557207	80	2015	Wastewater_Hospital	1	A1	CUH_Sewer
19789_6#18	ERR1557047	18	2015	Wastewater_Hospital	2	A1	CUH_Sewer
19789_6#19	ERR1557048	18	2015	Wastewater_Hospital	2	A1	CUH_Sewer
19789_6#2	ERR1557031	80	2014	Wastewater_Hospital	1	A1	CUH_Sewer
19789_6#20	ERR1557049	80	2015	Wastewater_Hospital	1	A1	CUH_Sewer
19789_6#21	ERR1557050	18	2015	Wastewater_Hospital	2	A1	CUH_Sewer
19789_6#22	ERR1557051	18	2015	Wastewater_Hospital	2	A1	CUH_Sewer
19789_6#23	ERR1557052	80	2015	Wastewater_Hospital	1	A1	CUH_Sewer
19789_6#3	ERR1557032	18	2014	Wastewater_Hospital	2	A1	CUH_Sewer
19789_6#4	ERR1557033	18	2014	Wastewater_Hospital	2	A1	CUH_Sewer
19789_6#5	ERR1557034	132	2014	Wastewater_Hospital	1	A1	CUH_Sewer
19789_6#54	ERR1557083	80	2015	Human_Invasive	2	A1	CUH
19789_6#6	ERR1557035	1455	2014	Wastewater_Hospital	1	A1	CUH_Sewer
19789_6#7	ERR1557036	117	2014	Wastewater_Hospital	3	A1	CUH_Sewer
19789_7#109	ERR1557322	80	2014	Human_Invasive	1	A1	CUH
19789_7#12	ERR1557225	117	2014	Human_Invasive	3	A1	CUH
19789_7#13	ERR1557226	80	2014	Human_Invasive	1	A1	CUH
19789_7#14	ERR1557227	117	2014	Human_Invasive	3	A1	CUH
19789_7#15	ERR1557228	80	2014	Human_Invasive	1	A1	CUH
19789_7#16	ERR1557229	17	2014	Human_Invasive	2	A1	CUH
19789_7#17	ERR1557230	78	2015	Human_Invasive	3	A1	CUH
19789_7#18	ERR1557231	262	2015	Human_Invasive	2	A1	CUH
19789_7#19	ERR1557232	117	2014	Human_Invasive	3	A1	CUH
19789_7#20	ERR1557233	721	2015	Wastewater_Hospital	3	A1	CUH_Sewer
19789_7#21	ERR1557234	18	2015	Wastewater_Hospital	2	A1	CUH_Sewer
19789_7#22	ERR1557235	721	2015	Wastewater_Hospital	3	A1	CUH_Sewer
19789_7#23	ERR1557236	80	2015	Wastewater_Hospital	1	A1	CUH_Sewer
19789_7#24	ERR1557237	80	2016	Human_Invasive	1	A1	CUH
19952_1#12	ERR1585853	80	2014	Wastewater_Hospital	1	A1	CUH_Sewer
19952_1#164	ERR1586005	117	2015	Wastewater_Hospital	2	A1	CUH_Sewer
19952_1#25	ERR1585866	78	2015	Wastewater_Hospital	3	A1	CUH_Sewer
19952_1#32	ERR1585873	80	2015	Human_Invasive	3	A1	CUH
19952_1#34	ERR1585875	192	2015	Wastewater_Hospital	3	A1	CUH_Sewer
19952_4#10	ERR1586396	18	2015	Human_Invasive	2	A1	CUH
19952_4#127	ERR1586513	80	2015	Human_Invasive	2	A1	CUH
19952_4#135	ERR1586521	18	2015	Wastewater_Hospital	2	A1	CUH_Sewer
19952_4#137	ERR1586523	80	2015	Human_Invasive	3	A1	CUH
19952_4#138	ERR1586524	17	2015	Human_Invasive	2	A1	CUH
T110	CP006030	812		Reference	6	B
64_3	CP012522	21		Reference	2
6E_6	CP013994	203		Reference	3
ATCC_700221	CP014449	17		Reference	2
Aus0004	CP003351	17		Reference	2
Aus0085	CP006620	203		Reference	3
DO	CP003583.1	18		Reference	2
EFE1021	LN999844.1	54		Reference	4
NRRL_B_2354	CP004063	860		Reference	2
UW8175	CP011828	904		Reference	3
