# Supplementary material for: Detection of vancomycin-resistant Enterococcus faecium hospital-adapted lineages in municipal wastewater treatment plants indicates widespread distribution and release into the environment
Source: Genome Res. 2019 Apr;29(4):626–34. doi: 10.1101/gr.232629.117 (PMC6442392; doi:10.1101/gr.232629.117)
Supplement: Supplemental Material [file supp_gr.232629.117_Supplemental_Table_S3.xlsx]

## Sheet: Suppl Table S3
Supplemental Table S3. List of sequence types (STs) detected in wastewater according to antibiotic selection.
Selective plate	Clade	Total number of STs	Total number of isolates	Results by ST
				1	17	18	19	21	22	32	38	52	54	60	64	70	78	80	83	92	94	97	107	117	125	132	148	168	178	192	202	203	214	224	230	253	262	266	280	296	361	372	401	412	413	474	502	533	563
No selection	Clade B	25	41											3							8		1						2					1						2	1					2
	Clade A2	34	50	1				1	4	3	3	1	1			1			1	2		2											1			6						1	1		2		1	1
	Clade A1	1	1		1
Ampicillin	Clade A2	10	29				3																				1	2		4								12					2						1
	Clade A1	20	83		4	23									1		2	28						1	1	1				2	1	3					4		2					3
Vancomycin	Clade A2	1	1																														1
	Clade A1	16	178		17	7											17	84						4						1		7			6		7		1
Table Legend
Results by ST column: list of ST in first row. Subsequent rows show number of isolates belonging to the respective ST according to selective plate and Clade.
ST numbers shown in bold are novel STs. ST 1478 lacks the pstS locus
The single A2 isolate recovered from vancomycin selective plates (ST214) shown in red was vancomycin-susceptible and lacked van resistance genes.
ST192 isolates clustered with A1 and A2.
[truncated: 47 more columns]
