# Supplementary material for: Detection of vancomycin-resistant Enterococcus faecium hospital-adapted lineages in municipal wastewater treatment plants indicates widespread distribution and release into the environment
Source: Genome Res. 2019 Apr;29(4):626–34. doi: 10.1101/gr.232629.117 (PMC6442392; doi:10.1101/gr.232629.117)
Supplement: Supplemental Material [file supp_gr.232629.117_Supplemental_Table_S4_.xlsx]

## Sheet: Suppl Table S4
Supplemental Table S4. List of resistance genes.
Antimicrobial	Class	Gene	Accession	Reference
	Oxazolidinone/pleuromutilins	optrA	KP399637.1_31477_33444	Wang JAC 2015B
	Macrolides	msr(C)_3	AE016830.1_1392319-1393767	Mikalsen BMC Gen 2015
	Macrolides (MLSB)	erm(A)-like (Tn554 variant)	KT862775	He JAC 2016
	Macrolides (PLSA resistance)	lsa(E)	KF421157	Li JAC 2014
	Aminoglycosides	aadA	AF052459.1_107-898	Mikalsen BMC Gen 2015
	Aminoglycosides	aadA2	AB253625_79-858	Mikalsen BMC Gen 2015
	Aminoglycosides	spw	AHWI01000032.1_1153_1962	Wendlandt 2013
	Streptothricins	sat4	AF330699_927_1469	Werner AAC 2001
	Bacitracin	bcrABDR_1 locus	AY496968_2325_3251	Wang JAC 2015
	Bacitracin	bcrABDR_2 locus	KJ645709.1_20875_21792	Wang JAC 2015
	Narasin	ABC transporter permease protein	ERR1007500	Nilsson VM 2016
	Narasin	ABC-type multidrug transport system, ATPase component	ERR1007500	Nilsson VM 2016
Metals	Cadmium	cadA	J04551.1_1064_3247	Mikalsen BMC Gen 2015
	Copper	tcrB	AY048044.2_4747_6879	Mikalsen BMC Gen 2015
	Copper	cueO	HM565232.1_5794_7377	Silveira JAC 2013
	Copper	copB	DQ089807.2_11993-14071	Silveira JAC 2013
	Copper	mco(pBMB171/P0245F)	CP001904.1_266489-268153	Silveira JAC 2013
	Copper	mco(p5578)	CP001603.1_2032_3192	Silveira JAC 2013
Biocides		sugE	CP004063.1_644257-644577	Fernandez_Fuentes IJFM 2014
		efrA	AE016830.1_2798453_2800180	Lavilla Lerma FM 2014
		efrB	AE016830.1_2796687_2798456	Lavilla Lerma FM 2014
