# Supplementary material for: Detection of vancomycin-resistant Enterococcus faecium hospital-adapted lineages in municipal wastewater treatment plants indicates widespread distribution and release into the environment
Source: Genome Res. 2019 Apr;29(4):626–34. doi: 10.1101/gr.232629.117 (PMC6442392; doi:10.1101/gr.232629.117)
Supplement: Supplemental Material [file supp_gr.232629.117_Supplemental_Table_S5_.xlsx]

## Sheet: Suppl Table S5
Supplemental Table S5. List of putative virulence genes.
Adhesion molecules	Gene	Alternate names	Accession	Reference	Evidence
LPXTG or LPXTG-type motif	acm		EFAU004_02292	vfdb, Nallapareddy 2003, 2006, 2008	rat endocarditis model, adhesion to collagen type I and IV
			M7W_2305	vfdb
	empABC pilus	ebpABCfm pilus, fms1-5-9, pilB	EFAU004_00930	vfdb, Sillanpaa 2008, 2009, 2010, Monteleagre 2016	rat endocarditis, mouse urinary tract infection model
			EFAU004_00931	vfdb
			EFAU004_00932	vfdb
	ecbA	fms18, orf2430	EFAU004_01867	vfdb, Hendrickx 2009	Adhesion to collagen V/fibrinogen
	esp			vfdb, Leavis 2004, Heikens 2007, Heikens Microb Infct 2011	rat endocarditis model
				vfdb
	pilA pilus	fms21, orf1904	CP003586.1_c26963-28939	Kim JMM 2010	-
	prpA	orf884	KF475784.1	Guzman Prieto Sci Rep 2015	Adhesion to fibrinogen/fibronectin in vitro
	scm	fms10	EFAU004_02838	vfdb, Sillanpaa 2008	Adhesion to collagen V/fibronectin in vitro
			EFAU085_02896	vfdb
	sgrA	fms2, orf2351	EFAU004_01513	vfdb, Hendrickx 2009	Adhesion to nidogen 1 and 2 and fibrinogen in vitro, biofilm formation
WxL domain proteins	lwpA	WxL16	CP003583.1_c2059798_2062278	Galloway-Pena 2015	rat endocarditis model
	swpA	WxL27	CP003583.1_c2063735_2064415
	lwpB	WxL410	CP003583.1_614780_617947
	swpB	WxL311	CP003583.1_618540_618995
	swpC	WxL5A9	CP003583.1_111529_112260
	lwpC	WxL5B8	CP003583.1_112405_114432
Other adherence, colonisation or biofilm-related factors	atlAEfm		293563962_27210_29228	Paganelli 2013	Biofilm formation
	bepA		293559555_42102_42962	Paganelli JID 2016	rat endocarditis model, biofilm formation in human serum
	bopD		EFAU004_00405	vfdb
	efaAEfm		EFAU004_00491	vfdb
	fnm	pavA homologue	389867183_c1350765-1349059	Somarajan 2015	Rat endocarditis model, Adhesion to fibronectin, collagen V, laminin
	ptsD		ABQJ01000092.1_14293_15114	Zhang JID 2013	Murine gut colonisation
	sagA		743955363_LN714742.1	Paganelli AEM 2015	Biofilm formation
			743955364_LN714743.1
Bile tolerance	gls33		389867183_1467075_1467977	Choudhury 2011	Mouse peritonitis model
	glsB		389867183_1466801_1467043
	gls20		389867183_1462262_1462819
	glsB1		389867183_1461988_1462230
	gltK		ABQJ01000080.1_3644_4300	Zhang BMC Gen 2013	bile salt resistance
Regulatory genes	asrR		293559660_29852-30292	Lebreton PLOS Path 2012	Biofilm formation, persistence in Galleria mellonella
	ebrB		293563987_68720_69925	Top PLOS One 2013	biofilm formation, mouse intestinal colonisation
	ccpA		AEBU01000039.1_1370_2389	Somarajan 2014	rat endocarditis model
Antiphagocytosis	cdsA	cpsB	EFAU004_01723	vfdb
	uppS	cpsA	EFAU004_01724	vfdb
